# Supplementary material for: The origin of ZnO twin crystals in bio-inspired synthesis
Source: Royal Society of Chemistry journal article supplement (doi:10.1039/c1ce05958k), 2011-11-24
Supplement: c1ce05958k.pdf [file c1ce05958k.pdf]

## Electronic Supplementary Information

### The Origin of ZnO Twin Crystals in Bio-inspired Synthesis

*Heather F. Greer, Wuzong Zhou, Ming-Han Liu, Yao-Hung Tseng and Chung-Yuan Mou*

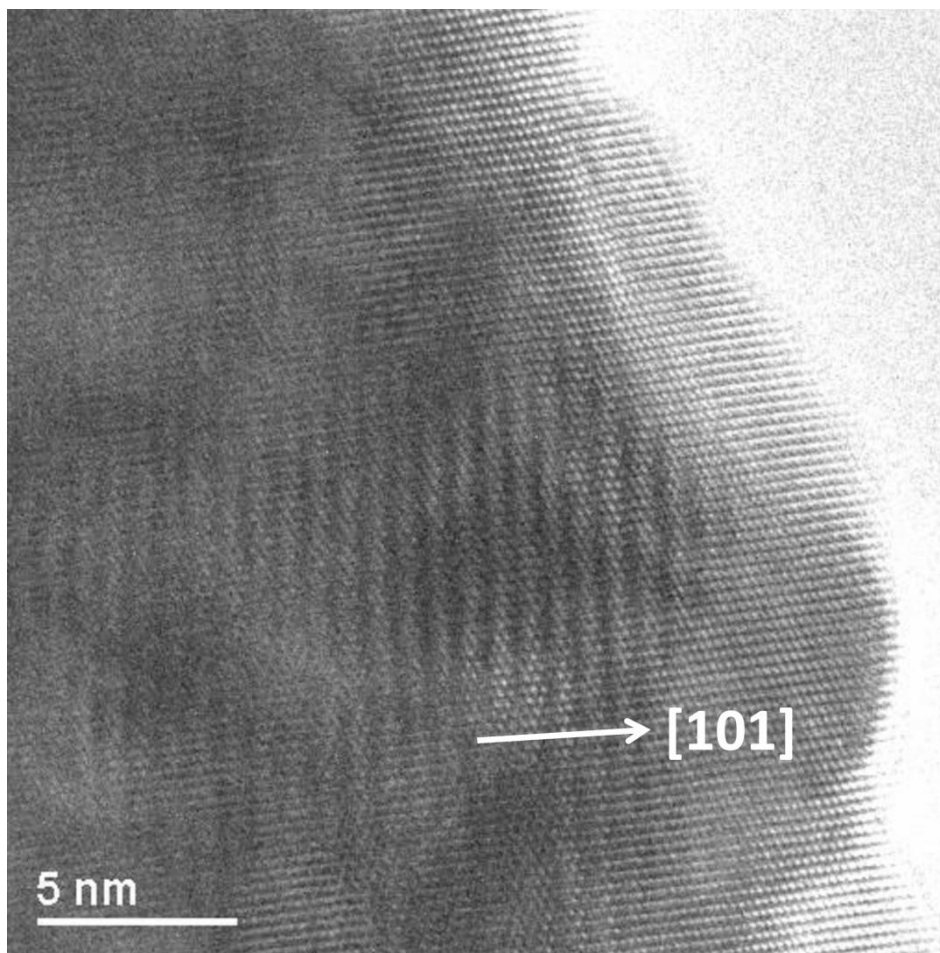

**Fig. S1** HRTEM image from the 2 h sample, showing 3-fold superstructure along the [101] zone axis of ZnO. It is possibly due to extra oxygen in the ZnO structure.

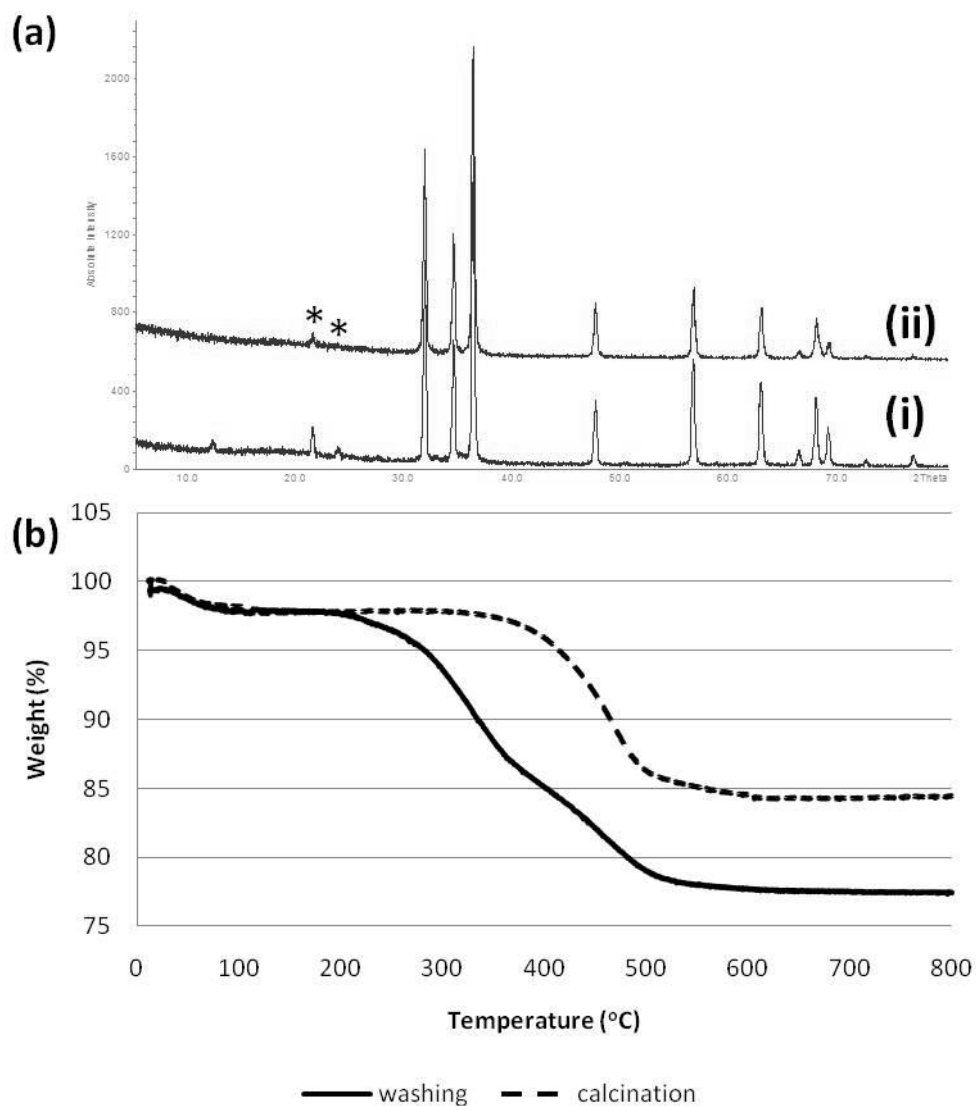

**Fig. S2** (a) XRD of samples prepared with a gelatin concentration of 5g/L for a reaction time of 21 h and the gelatin template removed by (i) washing three times with H<sub>2</sub>O at 40°C and (ii) calcination under N<sub>2</sub> at 600°C for 6 h. (b) The corresponding TGA results from the 21 h specimens whereby the gelatin has been removed by calcination or washing. The first mass loss observed between 10 and 115°C occurred from the evaporation of the water adsorbed in gelatin whilst the second mass loss observed between 170 and 650°C occurred from the decomposition of gelatin.

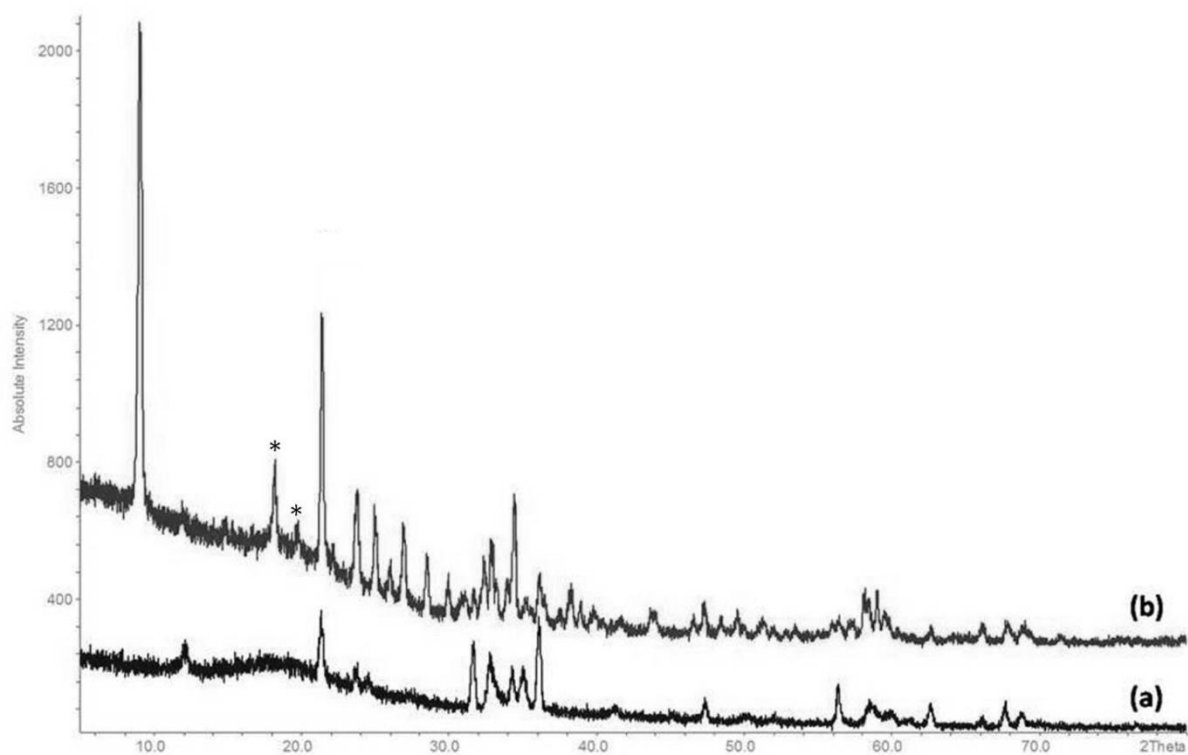

**Fig. S3** XRD of specimens prepared with varying concentrations of gelatin and hydrothermally treated for 2 h, (a) 5g/L (b) 0g/L. The principal phases are (a) ZnO and (b)  $\text{Zn}_5(\text{NO}_3)_2(\text{OH})_8 \cdot 2\text{H}_2\text{O}$ .
